# Supplementary material for: Multidrug-Resistant Commensal and Infection-Causing Staphylococcus spp. Isolated from Companion Animals in the Valencia Region
Source: MDPI journal article supplement (doi:10.3390/vetsci11020054), 2024-01-26
Supplement: s1 [file s1]

**Table S2.** Number of dog and cat *Staphylococcus* spp. strains isolated resistant to the different number of antimicrobials tested and their antimicrobial resistance patterns by antibiotic groups.

| N of AB groups | n of dog isolates (%) | n of cat isolates (%) | N of isolates (%) | AMR patterns |
|----------------|-----------------------|-----------------------|-------------------|--------------|
| 0              | 7 (6.2)               | 15 (20.3)             | 22 (11.8)         | -            |
| 1              | -                     | 2 (2.7)               | 2 (1.1)           | AMPH         |
|                | -                     | 1 (1.4)               | 1 (0.5)           | LINCO        |
|                | 2 (1.8)               | 4 (5.4)               | 6 (3.2)           | MACR         |
|                | 5 (4.4)               | 4 (5.4)               | 9 (4.8)           | PEN          |
|                | -                     | 2 (2.7)               | 2 (1.1)           | QUIN         |
|                | -                     | 3 (4.1)               | 3 (1.6)           | ANS          |
|                | 2 (1.8)               | 1 (1.2)               | 3 (1.6)           | TET          |
| 2              | -                     | 1 (1.4)               | 1 (0.5)           | AMINO-MACR   |
|                | -                     | 1 (1.4)               | 1 (0.5)           | AMPH-MACR    |
|                | 3 (2.7)               | -                     | 3 (1.6)           | AMPH-OXAZ    |
|                | 4 (3.5)               | -                     | 5 (2.7)           | AMPH-PEN     |
|                | -                     | 1 (1.4)               | 1 (0.5)           | AMPH-ANS     |
|                | 1 (0.9)               | 1 (1.4)               | 2 (1.1)           | AMPH-TET     |
|                | 1 (0.9)               | -                     | 1 (0.5)           | CEPHA-PEN    |
|                | 1 (0.9)               | -                     | 1 (0.5)           | CEPHA-TET    |
|                | -                     | 1 (1.4)               | 1 (0.5)           | GLYC-FOL     |
|                | -                     | 1 (1.4)               | 1 (0.5)           | GLICO-MACR   |
|                | -                     | 1 (1.4)               | 1 (0.5)           | LINC-PEN     |
|                | -                     | 1 (1.4)               | 1 (0.5)           | LINC-MACR    |
|                | 1 (0.9)               | -                     | 1 (0.5)           | LINC-OXAZ    |
|                | -                     | 1 (1.4)               | 1 (0.5)           | LINC-TET     |
|                | -                     | 2 (2.7)               | 2 (1.1)           | MAC-PEN      |

|   |         |         |         |                       |
|---|---------|---------|---------|-----------------------|
|   | -       | 1 (1.4) | 1 (0.5) | OXAZ-QUIN             |
|   | 2 (1.8) | -       | 1 (0.5) | OXAZ-PEN              |
|   | 1 (0.9) | -       | 2 (1.1) | PEN-MACR              |
|   | -       | 1 (1.4) | 1 (0.5) | PEN-QUIN              |
|   | 1 (0.9) | -       | 1 (0.5) | PEN-TET               |
|   | -       | 1 (1.4) | 1 (0.5) | QUIN-TET              |
|   |         |         | 1 (0.5) |                       |
|   | -       | 1 (1.4) | 1 (0.5) | AMINO-ANS-LINC        |
|   | -       | 1 (1.4) | 1 (0.5) | AMPH-LIPO-PEN         |
|   | -       | 1 (1.4) | 1 (0.5) | AMPH-GLICO-LINC       |
|   | 1 (0.9) | -       | 1 (0.5) | AMPH-GLYC-OXAZ        |
|   | 1 (0.9) | -       | 1 (0.5) | AMPH-LINC-PEN         |
|   | -       | 1 (1.4) | 1 (0.5) | AMPH-LINC-TET         |
|   | -       | 1 (1.4) | 1 (0.5) | AMPH-QUIN-TET         |
|   | 1 (0.9) | -       | 1 (0.5) | STREP-GLYC-LINC       |
| 3 | -       | 1 (1.4) | 1 (0.5) | STREP-PEN-ANS         |
|   | 2 (1.8) | -       | 2 (1.1) | MACR-PEN-TET          |
|   | -       | 1 (1.4) | 1 (0.5) | NIT-ANS-TET           |
|   | 1 (0.9) | -       | 1 (0.5) | GLYC-QUIN-TET         |
|   | -       | 1 (1.2) | 1 (0.5) | LINC-MACR-PEN         |
|   | -       | 1 (1.4) | 1 (0.5) | LINC-OXAZ-TET         |
|   | -       | 1 (1.4) | 1 (0.5) | LINC-PEN-QUIN         |
|   | 1 (0.9) | -       | 1 (0.5) | LIPO-MACR-PEN         |
|   | 1       | 1 (1.4) | 1 (0.5) | LIPO-PEN-ANS          |
|   | -       | 1 (1.4) | 1 (0.5) | AMINO-AMPHE- LIPO-ANS |
| 4 | -       | 1 (1.4) | 1 (0.5) | AMINO-MACR-NITRO-PEN  |
|   | 1 (0.9) | -       | 1 (0.5) | AMPH-FOL-MACR-PEN     |

|   |         |         |         |                           |
|---|---------|---------|---------|---------------------------|
| 5 | 1 (0.9) | -       | 1 (0.5) | AMPH-FOL-OXAZ-TET         |
|   | -       | 1 (1.4) | 1 (0.5) | AMPH-GLICO-MACR-PEN       |
|   | 1 (0.9) | -       | 1 (0.5) | AMPH-GLYC-CLIN-QUIN       |
|   | 6 (5.3) | 1 (1.4) | 7 (3.7) | AMPH-LINC-MACR-PEN        |
|   | 2 (1.8) | 1 (1.4) | 3 (1.6) | AMPH-LIPO-MACR-TET        |
|   | -       | 1 (1.4) | 1 (0.5) | CEPHA-LINC-LIPO-PEN       |
|   | -       | 1 (1.4) | 1 (0.5) | STREP-LINCO-PEN-TET       |
|   | -       | 1 (1.4) | 1 (0.5) | FOL-LINC-MACR-TET         |
|   | 1 (0.9) | -       | 1 (0.5) | GLYC-QUIN-ANS-TET         |
|   | 1 (0.9) | -       | 1 (0.5) | LINC-MACR-OXAZ-PEN        |
|   | -       | 1 (1.4) | 1 (0.5) | LINC-MACR-PEN-QUIN        |
|   | 1 (0.9) | -       | 1 (0.5) | MACR-CEPHA-PEN-TET        |
|   | 1 (0.9) | -       | 1 (0.5) | MACR-OXAZ-PEN-TET         |
|   | -       | 1 (1.4) | 1 (0.5) | AMINO-LINC-PEN-QUIN-TET   |
|   | 2 (1.8) | -       | 2 (1.1) | AMPH-FOL-CEPHA-PEN-TET    |
|   | 1 (0.9) | -       | 1 (0.5) | AMPH-GLYC-LINC-MACR-PEN   |
|   | 1 (0.9) | -       | 1 (0.5) | AMPH-GLYC-PEN-QUIN-TET    |
|   | 1 (0.9) | -       | 1 (0.5) | AMPH-GLYC-OXAZ-QUIN-TET   |
|   | 1 (0.9) | -       | 1 (0.5) | AMPH-LINC-MACR-CEPHA-PEN  |
|   | -       | 2 (2.7) | 2 (1.1) | AMPH-LINC-MACR-PEN-QUIN   |
|   | 3 (2.7) | -       | 3 (0.5) | AMPH-LINC-MACR-PEN-TET    |
|   | 1 (0.9) | -       | 1 (0.5) | AMPH-LINC-MACR-QUIN-TET   |
|   | 1 (0.9) | -       | 1 (0.5) | AMPH-MACR-PEN-ANS-TET     |
|   | 1 (0.9) | -       | 1 (0.5) | GLYC- CEPHA-MACR-PEN-QUIN |
|   | 1 (0.9) | -       | 1 (0.5) | GLYC-CEPHA-PEN-QUIN-TET   |
|   | 1 (0.9) | -       | 1 (0.5) | GLYC-FOL-PEN-QUIN-TET     |
|   | -       | 1 (1.4) | 1 (0.5) | LINC-MACR-PEN-QUIN-TET    |

|   |         |         |         |                                         |
|---|---------|---------|---------|-----------------------------------------|
| 6 | 1 (0.9) | -       | 1 (0.5) | AMINO-AMPH-GLYC-MACR-PEN-QUIN           |
|   | 1 (0.9) | -       | 1 (0.5) | AMINO-AMPH-MACR-PEN-QUIN-TET            |
|   | 1 (0.9) | -       | 1 (0.5) | AMINO-FOL-MACR-PEN-QUIN-TET             |
|   | 1 (0.9) | -       | 1 (0.5) | AMPH-CEPHA-GLYC-PEN-QUIN-TET            |
|   | -       | 1 (1.4) | 1 (0.5) | AMPH-CEPHA-LINC-MACR-PEN-QUIN           |
|   | 1 (0.9) | -       | 1 (0.5) | AMPH-STREP-LINC-MACR-PEN-QUIN           |
|   | 1 (0.9) | -       | 1 (0.5) | AMPH-GLICOP-LINC-MACR-OXAZ-PEN          |
|   | 2 (1.8) | 1 (1.4) | 3 (2.7) | AMPH-LINC-MACR-PEN-QUIN-TET             |
|   | 1 (0.9) | -       | 1 (0.5) | AMPH-LINC-MACR-OXAZ-PEN-ANS             |
|   | 1 (0.9) | -       | 1 (0.5) | GLYC-LINC-OXAZ-PEN-QUIN-TET             |
|   | 1 (0.9) | -       | 1 (0.5) | STREP- CEPHA-GLYC-LINC -PEN-QUIN        |
|   | 1 (0.9) | -       | 1 (0.5) | STREP-GLYC-LINC-MACR-OXAZ-PEN           |
| 7 | 1 (0.9) | -       | 1 (0.5) | AMINO-STREP-LINC-MACR-OXAZ-PEN-QUIN     |
|   | 1 (0.9) | -       | 1 (0.5) | AMINO-GLYC-MACR-PEN-QUIN-ANS-TET        |
|   | 2 (1.8) | -       | 2 (1.1) | AMINO-GLYC-LINC-MACR-PEN-QUIN-TET       |
|   | 1 (0.9) | -       | 1 (0.5) | AMINO-GLYC-MACR-PEN-QUIN-ANS-TET        |
|   | 1 (0.9) | -       | 1 (0.5) | AMINO-GLICOP-MACR-OXAZ-PEN-ANS-TET      |
|   | 3 (2.7) | -       | 3 (2.7) | AMPH-CEPHA-GLYC-LINC-MACR-PEN-QUIN      |
|   | 2 (1.8) | -       | 2 (1.1) | AMPH-FOL-GLICOP-LINC-MACR-PEN-QUIN      |
|   | 2 (1.8) | -       | 2 (1.1) | AMPH-GLYC-LINC-MACR-PEN-QUIN-TET        |
|   | 1 (0.9) | -       | 1 (0.5) | AMPH-GLYC-MACR-OXAZ-PEN-QUIN-TET        |
|   | 1 (0.9) | -       | 1 (0.5) | AMPH-GLYC-OXAZ-PEN-QUIN-ANS             |
|   | 1 (0.9) | -       | 1 (0.5) | GLYC-CEPHA-LINC-MACR-PEN-QUIN-TET       |
|   | -       | 1 (1.4) | 1 (0.5) | GLICO-MACR-NITRO-PEN-QUIN-ANS-TET       |
| 8 | 3 (1.8) | -       | 3 (2.7) | AMINO-AMPH-FOL-LINC-MACR-PEN-QUIN-TET   |
|   | 1 (0.9) | -       | 1(0.5)  | AMINO-AMPH-GLYC-LINC-MACR-PEN-QUIN-TET  |
|   | 1 (0.9) | -       | 1 (0.5) | AMINO-AMPH-LINC-MACR-NITRO-OXAZ-PEN-TET |

|           |         |         |         |                                                        |
|-----------|---------|---------|---------|--------------------------------------------------------|
|           | 1 (0.9) | -       | 1 (0.5) | AMPH-CEPHA-GLYC-LINCO-MACR-NITRO-PEN-QUIN              |
|           | 1 (0.9) | -       | 1 (0.5) | AMPH-STREP-LINC-MACR-CEPHA-PEN-QUIN-TET                |
|           | 1 (0.9) | -       | 1 (0.5) | AMPH-GLYC-FOL-LINC-MACR-PEN-QUIN-TET                   |
|           | 1 (0.9) | -       | 1 (0.5) | STREP-GLYC-LINC-MACR-CEPHA-PEN-QUIN-TET                |
| <b>9</b>  | 1 (0.9) | -       | 1 (0.5) | AMINO-AMPH-CEPHA-STREP-GLYC-LINC-MACR-PEN              |
|           | 1 (0.9) | -       | 1 (0.5) | AMINO-AMPH-FOL-GLYC-LINC-MACR-NITRO-PEN-QUIN           |
|           | 1 (0.9) | -       | 1 (0.5) | AMPH-CEPHA-FOL-GLYC-LINC-MACR-PEN-QUIN-TET             |
|           | 1 (0.9) | -       | 1 (0.5) | AMPH-CEPHA-GLYC-GLICOP-LINC-MACR-OXAZ-PEN-QUIN         |
| <b>10</b> | 1 (0.9) | -       | 1 (0.5) | AMINO-AMPH-CEPHA-FOL-GLYC-LINC-MACR-PEN-QUIN-TET       |
|           | -       | 1 (1.4) | 1 (0.5) | AMINO-CEPHA-LINC-LIPO-MACR-NITRO-PEN-QUIN-ANS-TET      |
|           | -       | 1 (1.4) | 1 (0.5) | AMPH-FOL-LINC-LIPO-MACR-NIT-OXAZ-QUIN-ANS-TET          |
| <b>11</b> | 1 (0.9) | -       | 1(0.5)  | AMINO-AMPH-CEPHA-FOL-GLYC-LINC-MACR-OXAZ-PEN-QUIN-TET  |
|           | 1 (0.9) | -       | 1 (0.5) | AMINO-CEPHA-STREP-GLYC-LINC-MACR-OXAZ-PEN-QUIN-ANS-TET |

N: total number, n: number. AB: antibiotics. AMR: antimicrobial resistance. AMINO: aminoglycosides. AMPH: amphenicols. CEPHA: cephalosporins. FOL: folate inhibitor pathwas. GLICOP: Glycopeptides. GLYC: glycylycyines. LINC: lincosamides. LIPO: lipopeptides. MACR: macrolides. NITRO: nitrofurans. OXAZ: oxazolidinones. PEN: penicillins. QUIN: quinolones. ANS: Ansamycin. STREP: streptogramins. TET: tetracyclines.
