# Supplementary material for: Multidrug-Resistant Commensal and Infection-Causing Staphylococcus spp. Isolated from Companion Animals in the Valencia Region
Source: Vet Sci. 2024 Jan 26;11(2):54. doi: 10.3390/vetsci11020054 (PMC10891909; doi:10.3390/vetsci11020054)
Supplement: Supplementary file 1 [file vetsci-11-00054-s001.zip › Table S1. AMR of all the strains isolated.xlsx]

## Sheet: Dog AMR
ANIMAL ID	BACTERIAL SPECIES	TYPE OF SAMPLE	Aminoglycosides	Amphenicols	Ansamycins	Cephalosporins	Glycylcyclines	Glycopeptides	Folate Inhibitor Pathway	Lincosamides	Lipopeptides	Macrolides	Nitrofurans	Oxazolidinones	Penicillins			Quinolones			Streptogramins	Tetracyclines	D-TEST
			Gentamicin	Chloramphenicol	Rifampicin	Cefoxitin	Tigecyclin	Vancomycin	Trimethoprim / Sulfamethoxazole	Clindamycin	Daptomycin	Erythromicin	Nutrofurantoin	Linezolid	Ampicillin	Oxacillin	Penicillin	Levofloxacin	Ciprofloxacin	Moxifloxacin	Quinupristin / Dalfopristin	Tetracycline
1	Staphylococcus schleiferi	Commensal mucosa	S	R	S	S	R	S	S	S	S	S	S	S	S	S	S	R	S	R	S	S
2	Staphylococcus schleiferi	Commensal mucosa	R	R	S	R	R	S	R	R	S	R	R	S	R	R	R	R	S	R	S	S	+
3	Staphylococcus schleiferi	Active skin infection	S	S	S	S	S	S	S	S	S	S	S	S	S	S	S	S	S	S	S	R
4	Staphylococcus schleiferi	Commensal mucosa	S	R	S	S	R	S	S	R	S	R	S	S	S	S	R	S	S	R	S	S	+
5	Staphylococcus schleiferi	Active skin infection	S	S	S	S	S	S	S	S	S	S	S	S	S	S	S	S	S	S	S	S
6	Staphylococcus pseudintermedius	Commensal mucosa	S	R	S	S	R	S	S	S	S	R	S	R	S	S	R	R	S	R	S	R
7	Staphylococcus pseudintermedius	Commensal mucosa	S	S	S	S	S	S	S	S	S	R	S	R	S	S	R	S	S	S	S	R
8	Staphylococcus pseudintermedius	Commensal mucosa	S	R	S	S	S	S	S	R	S	R	S	S	S	S	R	S	S	S	S	S
9	Staphylococcus pseudintermedius	Commensal mucosa	S	R	S	S	S	S	R	S	S	S	S	R	S	S	S	S	S	S	S	R
10	Staphylococcus pseudintermedius	Active skin infection	S	S	S	S	S	S	S	S	S	S	S	S	S	S	S	S	S	S	S	R
11	Staphylococcus pseudintermedius	Commensal mucosa	S	R	S	S	S	S	R	S	S	S	S	R	S	S	S	S	S	S	S	R
12	Staphylococcus pseudintermedius	Commensal mucosa	S	S	S	R	S	S	S	S	S	S	S	S	S	S	S	S	S	S	S	R
13	Staphylococcus pseudintermedius	Commensal mucosa	S	R	R	S	R	S	S	S	S	S	S	R	S	S	R	R	S	R	S	R
14	Staphylococcus pseudintermedius	Commensal mucosa	S	R	S	R	R	S	S	S	S	S	S	S	S	S	R	R	S	R	S	R
15	Staphylococcus pseudintermedius	Commensal mucosa	S	R	S	S	R	S	S	S	S	S	S	S	S	S	R	R	S	R	S	R
16	Mammaliicoccus sciuri	Commensal mucosa	S	S	S	S	R	S	S	R	S	S	S	S	S	S	S	S	S	R	R	S
17	Staphylococcus pseudintermedius	Commensal mucosa	S	R	S	S	S	S	S	R	S	R	S	S	S	S	S	S	S	S	S	R	+
18	Staphylococcus hominis	Commensal mucosa	S	S	S	R	S	S	S	S	S	R	S	S	R	R	R	S	S	S	S	R
19	Staphylococcus pseudintermedius	Commensal mucosa	S	R	S	R	S	S	S	S	S	S	S	S	R	R	R	S	S	S	S	S
20	Staphylococcus pseudintermedius	Commensal mucosa	S	S	S	S	S	S	S	S	S	S	S	S	S	S	R	S	S	S	S	S
21	Staphylococcus aureus	Commensal mucosa	R	R	S	S	S	R	S	S	S	R	S	R	R	R	R	S	S	S	S	R
22	Staphylococcus pseudintermedius	Commensal mucosa	S	R	S	S	S	S	S	R	S	R	S	S	S	R	R	S	S	S	S	R
23	Staphylococcus pseudintermedius	Commensal mucosa	R	R	S	S	S	S	S	R	S	R	R	R	S	S	R	S	S	R	S	R	+
24	Staphylococcus pseudintermedius	Commensal mucosa	S	R	S	S	S	S	S	S	S	S	S	R	S	S	S	S	S	S	S	S
25	Staphylococcus haemolyticus	Commensal mucosa	S	S	S	R	R	S	S	R	S	R	S	R	R	R	R	S	S	R	R	S	+
26	Staphylococcus pseudintermedius	Commensal mucosa	S	S	S	S	S	S	S	S	S	S	S	S	S	S	R	S	S	S	S	S
27	Staphylococcus aureus	Commensal mucosa	S	R	R	S	S	S	S	S	S	R	S	S	S	S	R	S	S	S	S	R	+
28	Staphylococcus pseudintermedius	Commensal mucosa	S	S	S	S	S	S	S	S	S	S	S	S	S	S	S	S	S	S	S	S
29	Staphylococcus pseudintermedius	Commensal mucosa	S	S	S	S	R	S	R	S	S	S	S	S	R	S	R	R	S	R	S	R
30	Mammaliicoccus sciuri	Commensal mucosa	S	S	R	S	R	S	S	S	S	S	S	R	S	S	S	R	S	R	S	S
31	Staphylococcus pseudintermedius	Commensal mucosa	S	R	S	S	S	S	S	S	S	S	S	S	S	S	R	S	S	S	S	S
32	Staphylococcus hominis	Commensal mucosa	S	R	S	R	S	S	R	S	S	S	S	S	R	R	R	S	S	S	S	R
33	Staphylococcus pseudintermedius	Commensal mucosa	S	R	S	S	S	S	S	S	S	S	S	S	S	S	R	S	S	S	S	S
34	Staphylococcus aureus	Commensal mucosa	S	R	S	S	S	R	S	R	S	R	S	R	S	S	R	S	S	S	S	S	+
35	Staphylococcus pseudintermedius	Commensal mucosa	S	S	S	S	S	S	S	S	S	R	S	S	S	S	R	S	S	S	S	R	+
36	Staphylococcus pseudintermedius	Commensal mucosa	R	R	S	S	R	S	S	R	S	R	S	S	S	S	R	R	S	R	S	R	+
37	Staphylococcus pseudintermedius	Commensal mucosa	R	R	S	R	R	S	S	S	S	R	S	S	R	R	R	R	S	R	S	R	+
38	Staphylococcus pseudintermedius	Commensal mucosa	R	R	S	R	R	S	S	S	S	R	S	S	R	R	R	R	S	R	S	R	+
39	Staphylococcus simulans	Commensal mucosa	S	S	S	S	R	S	S	S	S	S	S	S	S	S	S	R	S	R	S	R
40	Staphylococcus simulans	Commensal mucosa	R	R	S	R	R	S	S	S	S	R	S	S	R	R	R	R	S	R	S	S
41	Staphylococcus pseudintermedius	Commensal mucosa	S	R	S	R	R	S	R	R	S	R	S	S	R	R	R	R	S	R	S	R	+
42	Staphylococcus pseudintermedius	Commensal mucosa	S	R	S	R	R	S	R	R	S	R	S	S	R	R	R	R	S	R	S	R	+
43	Staphylococcus pseudintermedius	Commensal mucosa	R	R	S	R	R	S	S	R	R	R	S	S	R	R	R	S	S	R	R	S	+
44	Staphylococcus epidermidis	Commensal mucosa	S	S	S	R	S	S	S	S	R	R	S	S	R	R	R	S	S	S	S	S
45	Staphylococcus pseudintermedius	Commensal mucosa	S	S	S	S	R	S	S	S	S	S	S	R	S	S	S	R	S	R	S	R
46	Staphylococcus schleiferi	Commensal mucosa	S	S	S	R	R	S	S	R	S	R	S	S	R	R	R	R	S	R	S	R
47	Staphylococcus pseudintermedius	Commensal mucosa	S	S	S	R	R	S	S	S	S	S	S	S	R	R	R	R	S	R	S	S
48	Staphylococcus schleiferi	Commensal mucosa	S	S	R	S	R	S	S	S	S	S	S	S	S	S	S	R	S	R	S	R
49	Staphylococcus pseudintermedius	Commensal mucosa	S	R	S	R	R	S	S	R	S	R	R	S	R	R	R	R	S	R	S	S	+
50	Staphylococcus pseudintermedius	Commensal mucosa	S	R	S	S	R	S	S	R	S	R	S	S	R	S	R	R	0	R	S	R	+
51	Staphylococcus pseudintermedius	Commensal mucosa	S	R	S	R	R	S	S	R	S	R	S	S	R	R	R	R	0	R	S	R	+
52	Staphylococcus pseudintermedius	Commensal mucosa	S	R	S	S	S	S	S	R	S	R	S	S	S	S	R	S	S	S	S	R	+
53	Staphylococcus pseudintermedius	Commensal mucosa	R	R	S	R	R	S	R	R	S	R	S	R	R	R	R	R	S	R	S	R	+
54	Staphylococcus xylosus	Commensal mucosa	R	S	R	R	R	S	S	R	S	R	S	R	R	R	R	R	S	R	R	R	+
55	Staphylococcus epidermidis	Commensal mucosa	S	S	S	S	S	S	S	S	S	S	S	S	S	S	S	S	S	S	S	S
56	Staphylococcus pseudintermedius	Commensal mucosa	S	S	S	S	S	S	S	R	S	S	S	R	S	S	S	S	S	S	S	S
57	Staphylococcus aureus	Commensal mucosa	S	R	S	S	S	S	S	S	S	S	S	R	S	S	S	S	S	S	S	S
58	Staphylococcus schleiferi	Commensal mucosa	S	R	S	S	S	S	S	S	S	S	S	R	S	S	S	S	S	S	S	S
59	Staphylococcus schleiferi	Commensal mucosa	S	S	S	S	S	S	S	S	S	S	S	S	S	S	S	S	S	S	S	S
60	Staphylococcus warneri	Commensal mucosa	S	S	S	R	R	S	S	S	S	S	S	S	R	R	R	S	R	R	S	R
61	Staphylococcus hominis	Commensal mucosa	S	S	S	S	S	S	S	S	S	R	S	S	S	S	R	S	S	S	S	R
62	Staphylococcus xylosus	Commensal mucosa	S	R	S	R	S	S	S	S	S	S	S	S	R	R	R	S	S	S	S	S
63	Staphylococcus pseudintermedius	Commensal mucosa	S	S	S	S	S	S	S	S	S	S	S	R	S	S	S	S	S	R	S	S
64	Staphylococcus epidermidis	Commensal mucosa	S	S	S	S	R	S	S	R	S	S	S	R	S	S	R	S	S	R	S	R
65	Staphylococcus pseudintermedius	Commensal mucosa	S	R	S	S	R	S	S	S	S	S	S	R	S	S	S	S	S	R	S	R
66	Staphylococcus chromogenes	Active skin infection	S	S	S	S	S	S	S	S	S	S	S	S	S	S	S	S	S	S	S	S
67	Staphylococcus pseudintermedius	Active skin infection	S	S	S	R	S	S	S	S	S	S	S	S	R	R	R	S	S	S	S	S
68	Staphylococcus pseudintermedius	Commensal mucosa	S	R	R	S	S	S	S	R	S	R	S	R	R	S	R	S	S	S	S	S	+
69	Staphylococcus pseudintermedius	Active skin infection	R	S	S	R	S	S	S	R	S	R	S	R	R	R	R	R	S	S	R	S
70	Staphylococcus pseudintermedius	Active skin infection	S	S	S	R	S	S	S	S	S	S	S	S	R	R	R	S	S	S	S	S
71	Staphylococcus epidermidis	Active skin infection	R	S	S	R	S	S	R	S	S	R	S	S	R	R	R	R	S	R	S	R	+
72	Staphylococcus aureus	Commensal mucosa	S	R	S	R	R	R	S	R	S	R	S	R	R	R	R	R	S	R	S	S
73	Staphylococcus pseudintermedius	Active skin infection	S	S	S	S	S	S	S	S	S	S	S	S	R	S	R	S	S	S	S	S
74	Staphylococcus pseudintermedius	Commensal mucosa	S	S	S	S	S	S	S	S	S	S	S	R	R	S	R	S	S	S	S	S
75	Staphylococcus pseudintermedius	Commensal mucosa	S	R	S	S	S	S	R	S	S	R	S	S	R	S	R	S	S	S	S	S
76	Staphylococcus pseudintermedius	Commensal mucosa	S	R	S	S	S	S	S	R	S	R	S	S	R	S	R	S	S	S	S	R	+
77	Staphylococcus pseudintermedius	Commensal mucosa	S	S	S	R	R	S	S	S	S	R	S	S	R	R	R	R	S	R	S	S
78	Staphylococcus pseudintermedius	Commensal mucosa	S	S	S	R	R	S	S	R	S	S	S	S	R	R	R	R	S	R	R	S
79	Staphylococcus pseudintermedius	Commensal mucosa	S	S	S	R	R	S	S	R	S	R	S	S	R	R	R	R	S	R	R	R
80	Staphylococcus pseudintermedius	Commensal mucosa	S	R	S	R	R	S	S	R	S	R	S	S	R	R	R	R	S	S	S	S	+
81	Staphylococcus pseudintermedius	Commensal mucosa	S	R	S	R	S	S	S	R	S	R	S	S	R	R	R	S	S	S	S	S	+
82	Staphylococcus pseudintermedius	Commensal mucosa	S	R	S	R	R	S	S	R	S	R	S	S	R	R	R	R	S	S	S	S	+
83	Staphylococcus pseudintermedius	Commensal mucosa	S	R	S	R	S	S	S	R	S	R	S	S	R	R	R	S	S	S	S	S	+
84	Staphylococcus pseudintermedius	Commensal mucosa	S	R	S	R	R	S	S	R	S	R	S	S	R	R	R	R	S	S	S	S	+
85	Staphylococcus cohnii	Commensal mucosa	S	R	S	R	R	S	S	R	S	R	S	S	R	R	R	R	S	S	R	S	+
86	Staphylococcus pseudintermedius	Active skin infection	S	S	S	S	S	S	S	S	S	S	S	S	R	S	R	S	S	S	S	R
87	Staphylococcus pseudintermedius	Commensal mucosa	S	R	S	R	R	S	S	R	S	R	S	S	R	R	R	R	S	R	R	R	+
88	Staphylococcus pseudintermedius	Active skin infection	S	R	S	S	S	R	R	R	S	R	S	S	R	R	R	R	S	S	S	S	+
89	Staphylococcus pseudintermedius	Commensal mucosa	S	S	S	S	S	S	S	S	S	S	S	S	S	S	S	S	S	S	S	S
90	Staphylococcus aureus	Active skin infection	S	R	S	S	R	S	S	S	S	S	S	R	S	S	S	S	S	S	S	S
91	Staphylococcus warneri	Commensal mucosa	S	S	S	S	S	S	S	S	S	S	S	S	S	S	S	S	S	S	S	S
92	Staphylococcus epidermidis	Commensal mucosa	S	S	S	S	S	S	S	S	S	R	S	S	S	S	R	S	S	S	S	S
93	Staphylococcus pseudintermedius	Commensal mucosa	S	S	S	R	S	S	S	S	S	R	S	S	R	R	R	S	S	S	S	S
94	Staphylococcus pseudintermedius	Active skin infection	R	R	S	R	S	S	R	R	S	R	S	S	R	R	R	R	R	R	S	R	+
95	Staphylococcus pseudintermedius	Active skin infection	R	R	S	R	R	S	R	R	S	R	S	S	R	R	R	R	R	R	S	R	+
96	Staphylococcus aureus	Active skin infection	S	R	S	S	S	S	S	R	S	R	S	S	R	S	R	S	S	S	S	S	+
97	Staphylococcus pseudintermedius	Commensal mucosa	S	R	S	S	S	S	S	R	S	R	S	S	R	S	R	S	S	S	S	S	+
98	Staphylococcus pseudintermedius	Commensal mucosa	S	R	S	S	S	S	S	S	S	S	S	S	S	S	S	S	S	S	S	R
99	Staphylococcus aureus	Commensal mucosa	S	S	S	S	S	S	S	R	S	R	S	R	R	S	R	S	S	S	S	S
100	Staphylococcus epidermidis	Active skin infection	S	R	S	S	S	S	S	R	S	R	S	S	S	S	R	S	S	S	S	S	+
101	Staphylococcus aureus	Active skin infection	S	S	S	R	S	S	S	R	S	S	S	S	R	R	R	S	S	S	R	R
102	Staphylococcus canis	Active skin infection	S	S	S	S	S	S	S	S	S	R	S	S	S	S	S	S	S	S	S	S
103	Staphylococcus pseudintermedius	Active skin infection	S	S	S	S	S	S	S	S	S	S	S	S	S	S	R	S	S	S	S	S
104	Staphylococcus aureus	Active skin infection	S	R	S	S	S	S	S	R	S	R	S	S	S	S	R	S	S	S	S	S	+
105	Staphylococcus pseudintermedius	Active skin infection	S	R	S	S	S	S	S	R	S	R	S	S	S	S	R	R	R	R	S	R	+
106	Staphylococcus pseudintermedius	Active skin infection	S	R	S	S	S	S	S	R	S	R	S	S	S	S	S	R	R	R	S	R	+
107	Staphylococcus felis	Active skin infection	S	S	S	S	S	S	S	S	S	S	S	S	S	S	S	S	S	S	S	S
108	Staphylococcus pseudintermedius	Active skin infection	S	R	S	S	S	S	S	R	S	S	S	S	R	S	R	S	S	S	S	S
109	Staphylococcus pseudintermedius	Active skin infection	R	R	S	S	S	S	R	R	S	R	S	S	R	S	R	R	R	R	S	R	+
110	Staphylococcus pseudintermedius	Active skin infection	S	R	S	S	S	S	S	R	S	R	S	S	S	S	R	R	R	R	S	R	+
111	Staphylococcus pseudintermedius	Active skin infection	R	R	S	S	S	S	S	S	S	R	S	S	R	S	R	S	R	S	S	R	+
112	Staphylococcus pseudintermedius	Active skin infection	S	S	S	S	S	S	S	S	S	S	S	R	R	S	R	S	S	S	S	S
113	Staphylococcus pseudintermedius	Active skin infection	S	S	S	S	S	S	S	S	S	R	S	S	S	S	S	S	S	S	S	S

## Sheet: Cat AMR
ANIMAL ID	BACTERIAL SPECIES	TYPE OF SAMPLE	Aminoglycosides	Amphenicols	Ansamycins	Cephalosporins	Glycylcyclines	Glycopeptides	Folate Inhibitor Pathway	Lincosamides	Lipopeptides	Macrolides	Nitrofurans	Oxazolidinones	Penicillins			Quinolones			Streptogramins	Tetracyclines	D-TEST
			Gentamicin	Chloramphenicol	Rifampicin	Cefoxitin	Tigecyclin	Vancomycin	Trimethoprim / Sulfamethoxazole	Clindamycin	Daptomycin	Erythromicin	Nutrofurantoin	Linezolid	Ampicillin	Oxacillin	Penicillin	Levofloxacin	Ciprofloxacin	Moxifloxacin	Quinupristin / Dalfopristin	Tetracycline
1	Staphylococcus simulans	Commensal mucosa	S	S	R	S	S	S	S	S	S	S	S	S	S	S	S	S	S	S	S	S
2	Staphylococcus simulans	Commensal mucosa	S	R	S	S	S	S	S	S	S	S	S	S	S	S	S	S	R	S	S	S
3	Staphylococcus aureus	Commensal mucosa	S	S	S	S	S	S	S	S	S	S	S	S	S	S	S	S	S	S	S	S
4	Staphylococcus xylosus	Commensal mucosa	S	S	R	R	S	S	S	S	S	S	S	S	R	R	R	S	S	S	R	S
5	Staphylococcus hominis	Commensal mucosa	S	S	S	R	S	S	S	S	S	R	S	S	R	R	R	S	S	S	S	R
6	Staphylococcus aureus	Commensal mucosa	S	S	S	S	S	S	S	S	S	S	S	S	R	S	R	S	S	S	S	S
7	Staphylococcus felis	Commensal mucosa	S	R	R	S	S	S	S	S	S	S	S	S	S	S	S	S	S	S	S	S
8	Staphylococcus felis	Commensal mucosa	S	S	S	S	S	S	S	R	S	S	S	S	S	S	S	S	S	S	S	S
9	Mammaliicoccus sciuri	Commensal mucosa	S	S	S	R	S	S	S	S	S	S	S	S	R	R	R	S	S	S	S	R
10	Staphylococcus aureus	Commensal mucosa	S	S	S	S	S	S	S	S	S	S	S	S	S	S	S	S	S	S	S	S
11	Staphylococcus felis	Commensal mucosa	R	S	R	S	S	S	S	R	S	S	S	S	S	S	S	S	S	S	S	S
12	Staphylococcus epidermidis	Commensal mucosa	S	S	S	S	S	S	S	S	S	R	S	S	S	S	S	S	S	S	S	S
13	Staphylococcus simulans	Commensal mucosa	S	S	S	S	S	S	S	S	S	S	S	S	S	S	S	S	S	S	S	S
14	Staphylococcus felis	Commensal mucosa	S	S	S	S	S	S	S	S	S	S	S	S	S	S	S	S	S	S	S	S
15	Staphylococcus felis	Active skin infection	S	S	S	R	S	S	S	R	S	S	S	S	R	R	R	R	S	R	R	S
16	Staphylococcus felis	Commensal mucosa	S	R	S	R	S	S	S	S	R	S	S	S	R	R	R	S	S	S	S	S
17	Staphylococcus felis	Commensal mucosa	S	S	S	S	S	S	S	S	S	S	S	S	S	S	S	S	S	S	S	S
18	Staphylococcus aureus	Commensal mucosa	S	R	S	S	S	S	S	S	S	R	S	S	S	S	S	S	S	S	S	S	+
19	Staphylococcus pettenkoferi	Commensal mucosa	S	S	S	S	S	S	S	S	S	S	S	S	S	S	S	S	S	S	S	S
20	Staphylococcus felis	Commensal mucosa	S	R	S	S	S	S	S	S	S	S	S	S	S	S	S	S	S	S	S	R
21	Staphylococcus aureus	Commensal mucosa	S	S	S	S	S	S	S	S	S	R	S	S	S	S	S	S	S	S	S	S
22	Staphylococcus simulans	Commensal mucosa	S	S	S	R	S	S	S	R	S	R	S	S	R	R	R	S	S	S	S	S
23	Staphylococcus pseudintermedius	Commensal mucosa	S	S	S	S	S	S	S	S	S	R	S	S	S	S	R	S	S	S	S	S
24	Staphylococcus capitis	Commensal mucosa	S	R	S	S	S	S	S	R	S	R	S	S	R	S	R	R	S	S	S	S
25	Staphylococcus felis	Commensal mucosa	S	S	S	S	S	S	S	S	S	S	S	S	S	S	S	S	S	S	S	R
26	Staphylococcus felis	Commensal mucosa	S	S	R	S	S	S	S	S	S	S	R	S	S	S	S	S	S	S	S	R
27	Staphylococcus pasteuri	Active skin infection	S	S	S	R	S	S	S	S	S	S	S	S	R	R	R	S	S	S	S	S
28	Staphylococcus felis	Active skin infection	S	R	S	S	S	S	S	R	S	R	S	S	R	S	R	S	R	R	S	S	+
29	Staphylococcus felis	Commensal mucosa	S	S	S	S	S	R	S	S	S	R	S	S	S	S	S	S	S	S	S	S
30	Staphylococcus felis	Commensal mucosa	S	S	S	S	S	S	S	S	S	S	S	S	S	S	S	S	S	S	S	S
31	Staphylococcus felis	Commensal mucosa	S	S	S	S	R	S	R	S	S	S	S	S	S	S	S	S	S	S	S	S
32	Staphylococcus felis	Commensal mucosa	S	S	S	S	R	S	S	R	S	S	S	S	R	S	R	S	S	S	S	S
33	Staphylococcus felis	Active skin infection	S	S	S	S	S	S	S	S	S	S	S	S	R	S	R	S	S	S	S	S
34	Staphylococcus felis	Commensal mucosa	S	R	S	S	S	R	S	R	S	S	S	S	S	S	S	S	S	S	S	S
35	Staphylococcus felis	Commensal mucosa	S	S	R	S	S	S	S	S	S	S	S	S	S	S	S	S	S	S	S	S
36	Staphylococcus felis	Commensal mucosa	S	S	S	S	S	S	S	S	S	S	S	S	S	S	S	S	S	S	S	S
37	Staphylococcus saprophyticus	Commensal mucosa	S	S	S	S	S	S	S	S	S	R	S	S	S	S	S	S	S	S	S	S
38	Staphylococcus schleiferi	Commensal mucosa	S	S	S	S	S	S	R	R	S	R	S	S	S	S	S	S	S	S	R	R
39	Staphylococcus epidermidis	Commensal mucosa	R	S	S	S	S	S	S	S	S	R	S	S	S	S	S	S	S	S	S	S
40	Staphylococcus felis	Commensal mucosa	S	S	S	S	S	S	S	S	S	S	S	S	S	S	S	S	S	S	S	S
41	Staphylococcus felis	Commensal mucosa	S	S	R	S	S	S	S	S	S	S	S	S	S	S	S	S	S	S	S	S
42	Staphylococcus felis	Commensal mucosa	S	S	S	S	S	S	S	S	S	S	S	S	S	S	S	S	S	S	S	S
43	Staphylococcus schleiferi	Commensal mucosa	S	R	R	S	R	S	R	R	R	R	R	R	S	S	S	S	S	R	R	R
44	Staphylococcus felis	Commensal mucosa	S	S	S	S	S	S	S	S	S	S	S	S	S	S	S	S	S	S	S	S
45	Staphylococcus felis	Commensal mucosa	S	S	S	S	S	S	S	S	S	S	S	S	S	S	S	S	S	S	R	S
46	Staphylococcus felis	Commensal mucosa	S	S	S	S	S	S	S	S	S	S	S	S	S	S	S	S	S	R	S	S
47	Staphylococcus felis	Active skin infection	S	S	S	S	S	S	S	S	S	S	S	S	S	S	S	S	S	S	S	S
48	Staphylococcus capitis	Commensal mucosa	R	S	R	R	S	S	S	R	R	R	R	S	R	R	R	R	R	R	R	R	+
49	Staphylococcus felis	Commensal mucosa	S	S	S	S	S	S	S	S	S	S	S	S	S	S	S	S	R	S	S	S
50	Staphylococcus felis	Commensal mucosa	S	S	S	S	S	S	S	R	S	S	S	R	S	S	S	S	S	S	R	R
51	Staphylococcus felis	Commensal mucosa	R	R	R	S	S	S	S	S	R	S	S	S	S	S	S	S	S	S	R	S
52	Staphylococcus pettenkoferi	Commensal mucosa	S	S	S	S	S	S	S	S	S	S	S	S	S	S	S	S	S	S	S	S
53	Staphylococcus felis	Commensal mucosa	S	S	S	S	S	S	S	S	S	S	S	S	S	S	S	S	S	S	S	S
54	Staphylococcus felis	Commensal mucosa	S	R	S	S	S	S	S	S	S	S	S	S	S	S	S	S	S	S	S	S
55	Staphylococcus epidermidis	Active skin infection	S	R	S	S	S	S	S	R	S	R	S	S	R	S	R	R	R	R	S	R	+
56	Staphylococcus hominis	Active skin infection	S	R	S	S	S	S	S	S	R	R	S	S	S	S	S	S	S	S	S	R
57	Staphylococcus simulans	Commensal mucosa	R	S	S	R	S	S	S	S	S	R	R	S	R	R	R	S	S	S	S	S
58	Mammaliicoccus sciuri	Commensal mucosa	S	S	S	R	S	S	S	S	S	S	S	S	R	R	R	R	S	S	S	S
59	Staphylococcus aureus	Commensal mucosa	S	S	S	S	S	S	S	S	S	R	S	S	S	S	S	S	S	S	S	S	+
60	Staphylococcus felis	Active skin infection	S	R	S	S	S	S	S	R	S	S	S	S	S	S	S	S	S	S	S	R
61	Staphylococcus aureus	Active skin infection	S	S	R	S	S	R	S	S	S	R	R	S	R	S	R	R	R	R	S	R
62	Staphylococcus xylosus	Commensal mucosa	S	S	S	S	S	S	S	R	S	R	S	S	S	S	S	S	S	S	S	S
63	Staphylococcus felis	Commensal mucosa	S	S	S	S	S	S	S	S	S	S	S	S	S	S	S	S	S	S	S	S
64	Staphylococcus felis	Commensal mucosa	S	S	S	S	S	S	S	S	S	S	S	R	S	S	S	S	R	S	R	S
65	Staphylococcus pseudintermedius	Commensal mucosa	S	R	S	S	S	S	S	R	S	R	S	S	S	S	R	S	S	S	S	S	+
66	Mammaliicoccus sciuri	Commensal mucosa	S	S	S	S	S	S	S	S	S	S	S	S	S	S	S	R	S	S	S	R
67	Staphylococcus felis	Commensal mucosa	S	R	S	S	S	S	S	S	S	S	S	S	S	S	S	S	S	R	S	R
68	Staphylococcus xylosus	Commensal mucosa	S	R	S	R	S	R	S	S	S	R	S	S	R	R	R	S	S	S	S	S	+
69	Staphylococcus felis	Commensal mucosa	S	S	S	S	S	S	S	R	S	S	S	S	S	S	S	S	S	S	R	R
70	Staphylococcus simulans	Commensal mucosa	S	R	S	R	S	S	S	R	S	R	S	S	R	R	R	R	R	R	S	S	+
71	Staphylococcus xylosus	Commensal mucosa	R	S	S	R	S	S	S	R	S	S	S	S	R	R	R	S	S	R	S	R	+
72	Mammaliicoccus sciuri	Commensal mucosa	S	S	S	R	S	S	S	R	S	R	S	S	R	R	R	R	R	R	S	R	+
73	Staphylococcus felis	Commensal mucosa	S	S	S	R	S	S	S	R	S	R	S	S	R	R	R	R	R	R	S	S	+
74	Staphylococcus pseudintermedius	Commensal mucosa	S	S	S	R	S	S	S	R	R	S	S	S	R	R	R	S	R	S	S	S
